# Supplementary material for: Attenuated strain of CVB3 with a mutation in the CAR-interacting region protects against both myocarditis and pancreatitis
Source: PubMed Central journal article supplement (PMC8203608; doi:10.1038/s41598-021-90434-w), 2021-06-14
Supplement: 41598_2021_90434_MOESM1_ESM.pdf [file 41598_2021_90434_MOESM1_ESM.pdf]

**Attenuated strain of CVB3 with a mutation in the CAR-interacting region protects against  
both myocarditis and pancreatitis**

Ninaad Lasrado<sup>a</sup>, Arunakumar Gangaplara<sup>a,1</sup>, Chandirasegaran Massilamany<sup>a,2</sup>, Rajkumar Arumugam<sup>a</sup>, Allison Shelbourn<sup>a</sup>, Mahima T. Rasquinha<sup>a</sup>, Rakesh H. Basavalingappa<sup>a,3</sup>, Gustavo Delhon<sup>a</sup>, Shi-Hua Xiang<sup>a,b</sup>, Asit K. Pattnaik<sup>a,b</sup>, David Steffen<sup>a</sup>, and Jay Reddy<sup>a\*</sup>

<sup>a</sup>School of Veterinary Medicine and Biomedical Sciences, University of Nebraska-Lincoln, Lincoln, NE; <sup>b</sup>Nebraska Center for Virology, University of Nebraska-Lincoln, Lincoln, NE;

**Present address:**

<sup>1</sup>Laboratory of Early Sickle Mortality Prevention, Cellular and Molecular Therapeutics Branch, National Heart, Lung, and Blood Institute, National Institutes of Health, Bethesda, MD

<sup>2</sup>CRISPR Therapeutics, Cambridge, MA

<sup>3</sup>Aclaris Therapeutics, Inc., St. Louis, MO

**Running title:** Mutations in the CVB3 genome affecting disease phenotype

**\*Corresponding author:**

Jay Reddy MVSc., PhD  
Room 202, Bldg. VBS  
School of Veterinary Medicine and Biomedical Sciences  
University of Nebraska-Lincoln  
Lincoln, NE 68583  
Phone: (402) 472 8541  
Fax: (402) 472 9690  
E-mail: nreddy2@unl.edu

**Table S1: Amino acid and nucleotide codons of VP1 771-790**

| Amino acid position | Amino acids           | Codons     |
|---------------------|-----------------------|------------|
| 771                 | Arginine (R)          | AGG        |
| 772                 | Asparagine (N)        | AAC        |
| 773                 | Glycine (G)           | GGA        |
| 774                 | Valine (V)            | GTT        |
| 775                 | <u>Tyrosine (Y)</u>   | <u>TAC</u> |
| 776                 | <u>Glycine (G)</u>    | <u>GGC</u> |
| 777                 | <u>Isoleucine (I)</u> | <u>ATC</u> |
| 778                 | Asparagine (N)        | AAC        |
| 779                 | Threonine (T)         | ACG        |
| 780                 | <u>Leucine (L)</u>    | CTA        |
| 781                 | Asparagine (N)        | AAC        |
| 782                 | Asparagine (N)        | AAC        |
| 783                 | <b>Methionine (M)</b> | <b>ATG</b> |
| 784                 | <b>Glycine (G)</b>    | <b>GGC</b> |
| 785                 | <b>Threonine (T)</b>  | <b>ACG</b> |
| 786                 | <u>Leucine (L)</u>    | <u>CTA</u> |
| 787                 | <u>Tyrosine (Y)</u>   | <u>TAT</u> |
| 788                 | <u>Alanine (A)</u>    | <u>GCA</u> |
| 789                 | <u>Arginine (R)</u>   | <u>AGA</u> |
| 790                 | <u>Histidine (H)</u>  | <u>CAT</u> |

Note: Bold residues (M, G and T) are partially buried, but they interact with CAR. Underlined residues (Y, G, I, L, A, L, Y, R, and H) are buried, but do not interact with CAR.

**Table S2: List of primers used for the creation of CVB3 mutant viruses**

| Sl No. | Primer name            | Sequence                             |
|--------|------------------------|--------------------------------------|
| 1      | SPEI-P2 Reverse Primer | 5' ggagtcttgaccactagtgattctttc 3'    |
| 2      | XHOI-P3 Forward Primer | 5' accagggtactcgagtgttttag 3'        |
| 3      | Mt 1 Forward Primer    | 5' ccaggaacggagttgccggcatcaa 3'      |
| 4      | Mt 2 Forward Primer    | 5' ccaggaacggagtttacgccatcaaac 3'    |
| 5      | Mt 3 Forward Primer    | 5' ttacggcgccaacacgctaac 3'          |
| 6      | Mt 4 Forward Primer    | 5' atcaacacggcaacaacatg 3'           |
| 7      | Mt 5 Forward Primer    | 5' ccaggaacggagttgccgcccaacacg 3'    |
| 8      | Mt 6 Forward Primer    | 5' aaacaacatgggcacggcatatgcaag 3'    |
| 9      | Mt 7 Forward Primer    | 5' gggcacgctagctgcaagacatg 3'        |
| 10     | Mt 8 Forward Primer    | 5' gggcacgctatatggaagacatgt 3'       |
| 11     | Mt 9 Forward Primer    | 5' gggcacgctatatgcagcacatgtcaac 3'   |
| 12     | Mt 10 Forward Primer   | 5' atatgcaagagctgtcaacgctgg 3'       |
| 13     | Mt 11 Forward Primer   | 5' gggcacggcagctggagcagctgtcaacgc 3' |
| 14     | SPE-CVB Forward Primer | 5' ataccaatcccatgtgcttttag 3'        |
| 15     | SPE-CVB Reverse Primer | 5' aaccgataagggctagtgtggcag 3'       |

**Table S3: The list of mutations introduced within VP1 771-790 in the CVB3 genome**

| <b>Amino acid position</b> | <b>Residue/s to be mutated to Alanine/Glycine</b>                                                                     | <b>Original codon</b>  | <b>Mutated codon</b>   |
|----------------------------|-----------------------------------------------------------------------------------------------------------------------|------------------------|------------------------|
| VP1 775                    | Y to A (Tyrosine to Alanine)                                                                                          | <u>TAC</u>             | <u>GCC</u>             |
| VP1 776                    | G to A (Glycine to Alanine)                                                                                           | <u>GGC</u>             | <u>GCC</u>             |
| VP1 777                    | I to A (Isoleucine to Alanine)                                                                                        | <u>ATC</u>             | <u>GCC</u>             |
| VP1 780                    | L to A (Leucine to Alanine)                                                                                           | <u>CTA</u>             | <u>GCA</u>             |
| VP1 775-777                | YGI to AAA (Tyrosine, Glycine and Isoleucine to Alanine, Alanine and Alanine)                                         | <u>TACGGCATC</u>       | <u>GCCGCCGCC</u>       |
| VP1 786                    | L to A (Leucine to Alanine)                                                                                           | <u>CTA</u>             | <u>GCA</u>             |
| VP1 787                    | Y to A (Tyrosine to Alanine)                                                                                          | <u>TAT</u>             | <u>GCT</u>             |
| VP1 788                    | A to G (Alanine to Glycine)                                                                                           | <u>GCA</u>             | <u>GGA</u>             |
| VP1 789                    | R to A (Arginine to Alanine)                                                                                          | <u>AGA</u>             | <u>GCA</u>             |
| VP1 790                    | H to A (Histidine to Alanine)                                                                                         | <u>CAT</u>             | <u>GCT</u>             |
| VP1 786-790                | LYARH to AAGAA (Leucine, Tyrosine, Alanine, Arginine and Histidine to Alanine, Alanine, Glycine, Alanine and Alanine) | <u>CTATATGCAAGACAT</u> | <u>GCAGCTGGAGCAGCT</u> |

**Table S4: List of original and mutated nucleotide sequences of VP1 771-790 for the derivation of infectious mutant viruses**

| Mutations                       | Sequences (original, top; and mutated, bottom)                                                                                                          |
|---------------------------------|---------------------------------------------------------------------------------------------------------------------------------------------------------|
| 1. Y to A<br>(775)              | AGGAACGGAGTTTACGGCATCAACACGCTAAACAACATGGGCACGCTATATGCAAGACAT<br>AGGAACGGAGTTT <u>G</u> CCGGCATCAACACGCTAAACAACATGGGCACGCTATATGCAAGACAT                  |
| 2. G to A<br>(776)              | AGGAACGGAGTTTACGGCATCAACACGCTAAACAACATGGGCACGCTATATGCAAGACAT<br>AGGAACGGAGTTTACG <u>C</u> CATCAACACGCTAAACAACATGGGCACGCTATATGCAAGACAT                   |
| 3. I to A<br>(777)              | AGGAACGGAGTTTACGGCATCAACACGCTAAACAACATGGGCACGCTATATGCAAGACAT<br>AGGAACGGAGTTTACGGC <u>G</u> CCAACACGCTAAACAACATGGGCACGCTATATGCAAGACAT                   |
| 4. L to A<br>(780)              | AGGAACGGAGTTTACGGCATCAACACGCTAAACAACATGGGCACGCTATATGCAAGACAT<br>AGGAACGGAGTTTACGGCATCAACACG <u>G</u> CAAACAACATGGGCACGCTATATGCAAGACAT                   |
| 5. YGI to AAA<br>(775-777)      | AGGAACGGAGTTTACGGCATCAACACGCTAAACAACATGGGCACGCTATATGCAAGACAT<br>AGGAACGGAGTTT <u>GCCGCC</u> CAACACGCTAAACAACATGGGCACGCTATATGCAAGACAT                    |
| 6. L to A<br>(786)              | AGGAACGGAGTTTACGGCATCAACACGCTAAACAACATGGGCACGCTATATGCAAGACAT<br>AGGAACGGAGTTTACGGCATCAACACGCTAAACAACATGGGCACG <u>G</u> CATATGCAAGACAT                   |
| 7. Y to A<br>(787)              | AGGAACGGAGTTTACGGCATCAACACGCTAAACAACATGGGCACGCTATATGCAAGACAT<br>AGGAACGGAGTTTACGGCATCAACACGCTAAACAACATGGGCACGCTA <u>G</u> CTGCAAGACAT                   |
| 8. A to G<br>(788)              | AGGAACGGAGTTTACGGCATCAACACGCTAAACAACATGGGCACGCTATATGCAAGACAT<br>AGGAACGGAGTTTACGGCATCAACACGCTAAACAACATGGGCACGCTATATG <u>G</u> AAGACAT                   |
| 9. R to A<br>(789)              | AGGAACGGAGTTTACGGCATCAACACGCTAAACAACATGGGCACGCTATATGCAAGACAT<br>AGGAACGGAGTTTACGGCATCAACACGCTAAACAACATGGGCACGCTATATGCA <u>G</u> CACAT                   |
| 10. H to A<br>(790)             | AGGAACGGAGTTTACGGCATCAACACGCTAAACAACATGGGCACGCTATATGCAAGACAT<br>AGGAACGGAGTTTACGGCATCAACACGCTAAACAACATGGGCACGCTATATGCAAG <u>A</u> GCT                   |
| 11. LYARH to AAGAA<br>(786-790) | AGGAACGGAGTTTACGGCATCAACACGCTAAACAACATGGGCACGCTATATGCAAGACAT<br>AGGAACGGAGTTTACGGCATCAACACGCTAAACAACATGGGCACG <u>G</u> CAGCTG <u>G</u> A <u>G</u> CAGCT |
